# Supplementary material for: Impact of Updating the Cardiopulmonary Resuscitation Guidelines on Out‐of‐Hospital Shockable Cardiac Arrest: A Population‐Based Cohort Study in Japan
Source: PubMed Central journal article supplement — J Am Heart Assoc. 2024 Feb 16;13(4):e031394. doi: 10.1161/JAHA.123.031394 (PMC11010103; doi:10.1161/jaha.123.031394), 2024-02-16

# **SUPPLEMENTAL MATERIAL**

## **Investigators participating in the Japanese Circulation Society with Resuscitation**

### **Science Study (JCS-ReSS):**

Director-in-chief, Ken Nagao, MD (Department of Cardiology, Nihon University Hospital, Tokyo, Japan). Directors, Hiroshi Nonogi, MD (Faculty of Health Science, Osaka Aoyama University, Osaka, Japan) and Naohiro Yonemoto, DrPH (Department of Public Health, Juntendo University, Tokyo, Japan). Investigators, Choukou Genka, MD (Department of Cardiology, Yokohama Asahi Chuo General Hospital, Kanagawa, Japan), David F. Gaieski, M.D. (Department of Emergency Medicine, Sidney Kimmel Medical College at Thomas Jefferson University, Philadelphia, USA), Eizo Tachibana, MD (Department of Cardiology, Kawaguchi Municipal Medical Center, Kawaguchi, Japan), Hideharu Tanaka, MD (Department of Sport and Medical Science, Kokushikan University, Tokyo, Japan), Hiromi Seo, MD (Department of Cardiology, Kochi Medical School Hospital, Kochi, Japan), Hiroyuki Yokoyama, MD (Department of Cardiovascular Medicine, National Cerebral and Cardiovascular Center, Suita, Japan), Kazuo Kimura MD, (Department of Cardiology, Yokohama City University Medical Center, Yokohama, Japan), Keijiro Saku, MD (Department of Cardiology, Fukuoka University School, Fukuoka, Japan), Kunio Oota, MD (Department of Pediatrics, Kanazawa University, Kanazawa, Japan), Mamoru Hase, MD (Department of Cardiology, Sapporo Medical University, Sapporo, Japan), Migaku Kikuchi,

MD (Department of Cardiology, Dokkyo Medical University, Mibu, Japan), Morimasa Takayama, MD (Department of Cardiology, Sakakibara Heart Institute, Tokyo, Japan), Naoki Shimizu, MD (Department of Pediatric Emergency and Critical Care Medicine, Tokyo Metropolitan Children's Medical Center, Tokyo, Japan), Naoya Matsumoto, MD (Department of Cardiology, Nihon University Hospital, Tokyo, Japan), Noritoshi Ito, MD (Department of Cardiology, Kawasaki Saiwai Hospital, Kawasaki, Japan), Satoshi Takeda, MD (Department of Emergency Medicine, Jikei University, Tokyo, Japan), Shigemasa Tani, MD (Department of Cardiology, Nihon University Hospital, Tokyo, Japan), Shigeru Kanetsaka, MD (Department of Emergency and Critical Care Medicine, Yokohama Rosai Hospital, Yokohama, Japan), Shinichi Shirai, MD (Department of Cardiology, Kokura Memorial Hospital, Kitakyushu, Japan), Sunao Kojima, MD (Department of Cardiology, Kumamoto University, Kumamoto, Japan), Takanori Ikeda, MD (Department of Cardiology, Toho University Omori Medical Center, Tokyo, Japan), Takeshi Kimura, MD (Department of Cardiology, Kyoto University, Kyoto, Japan), Taku Iwami, MD (Health Service and the Center for Medical Education, Kyoto University, Kyoto, Japan), Tetsuya Matoba, MD (Department of Cardiology, Kyushu University Hospital, Fukuoka, Japan), Toshiaki Mano, MD (Department of Cardiology, Osaka University Hospital, Suita, Japan), Tetsuhisa Kitamura, MD (Medical center for Translational Research, Osaka University Hospital, Suita, Japan), Tsukasa Yagi, MD (Department of Cardiology, Nihon University Hospital, Tokyo,

Japan), Yasuo Okumura, MD (Division of Cardiology, Department of Medicine, Nihon University School of Medicine, Tokyo, Japan), Yoshihiko Seino, MD (Department of Cardiology, Nippon Medical School Chiba-Hokusoh Hospital, Inzai, Japan) and Yoshio Tahara, MD (Department of Cardiovascular Medicine, National Cerebral and Cardiovascular Center, Suita, Japan).

**Figure S1. Changes in basic life support for shockable cardiac arrest patients.**

|                                                                                                                       | The guidelines 2000 for CPR and ECC                                                            | The CoSTR 2005                   | The CoSTR 2010                                     | The CoSTR 2015                                        |
|-----------------------------------------------------------------------------------------------------------------------|------------------------------------------------------------------------------------------------|----------------------------------|----------------------------------------------------|-------------------------------------------------------|
| Citizen rescuers                                                                                                      |                                                                                                |                                  |                                                    |                                                       |
| Pulse check within 10 seconds                                                                                         | Elimination  |                                  |                                                    |                                                       |
| Breathing assessment and/or delivery of two breaths if no regular breathing                                           | Elimination  |                                  |                                                    |                                                       |
| Dispatcher-assisted chest compression only resuscitation                                                              | Acceptable, safe, and useful                                                                   | Acceptable, safe, and useful     | Acceptable, safe, and useful                       | Always acceptable, proven safe, and definitely useful |
| Basic life support maneuvers                                                                                          |                                                                                                |                                  |                                                    |                                                       |
| Procedure for the maneuvers                                                                                           | Airway • Breathing • Circulation                                                               | Airway • Breathing • Circulation | Circulation • Airway • Breathing                   | Circulation • Airway • Breathing                      |
| Compression rate                                                                                                      | ≈ 100/min                                                                                      | ≈ 100/min                        | ≥ 100/in                                           | 100~120/min                                           |
| Compression-ventilation ratio                                                                                         | 15: 2                                                                                          | 30: 2                            | 30: 2                                              | 30: 2                                                 |
| Compression depth                                                                                                     | 4~5 cm                                                                                         | 4~5 cm                           | ≥ 5 cm                                             | 5~6cm                                                 |
| Ventilation volume and duration                                                                                       | 10 mL/kg: ≥2sec                                                                                | 6~7 mL/kg: 1sec                  | 6~7 mL/kg: 1sec                                    | 6~7 mL/kg: 1sec                                       |
| Defibrillation protocol                                                                                               | 3-shock sequence                                                                               | 1-shock and 2 min CPR            | 1-shock and 2 min CPR                              | CPR, 1-shock and 2 min CPR                            |
| Post cardiac arrest syndrome care for comatose survivors after out-of-hospital cardiac arrest due to shockable arrest |                                                                                                |                                  | Hypothermia and percutaneous coronary intervention | 33°C~36°C and percutaneous coronary intervention      |

CPR indicates cardiopulmonary resuscitation; ECC, emergency cardiovascular care; CoSTR, international consensus on cardiopulmonary resuscitation and emergency cardiovascular care science with treatment recommendations.

**Figure S2. The percentage of the population in the eight districts of Japan.**

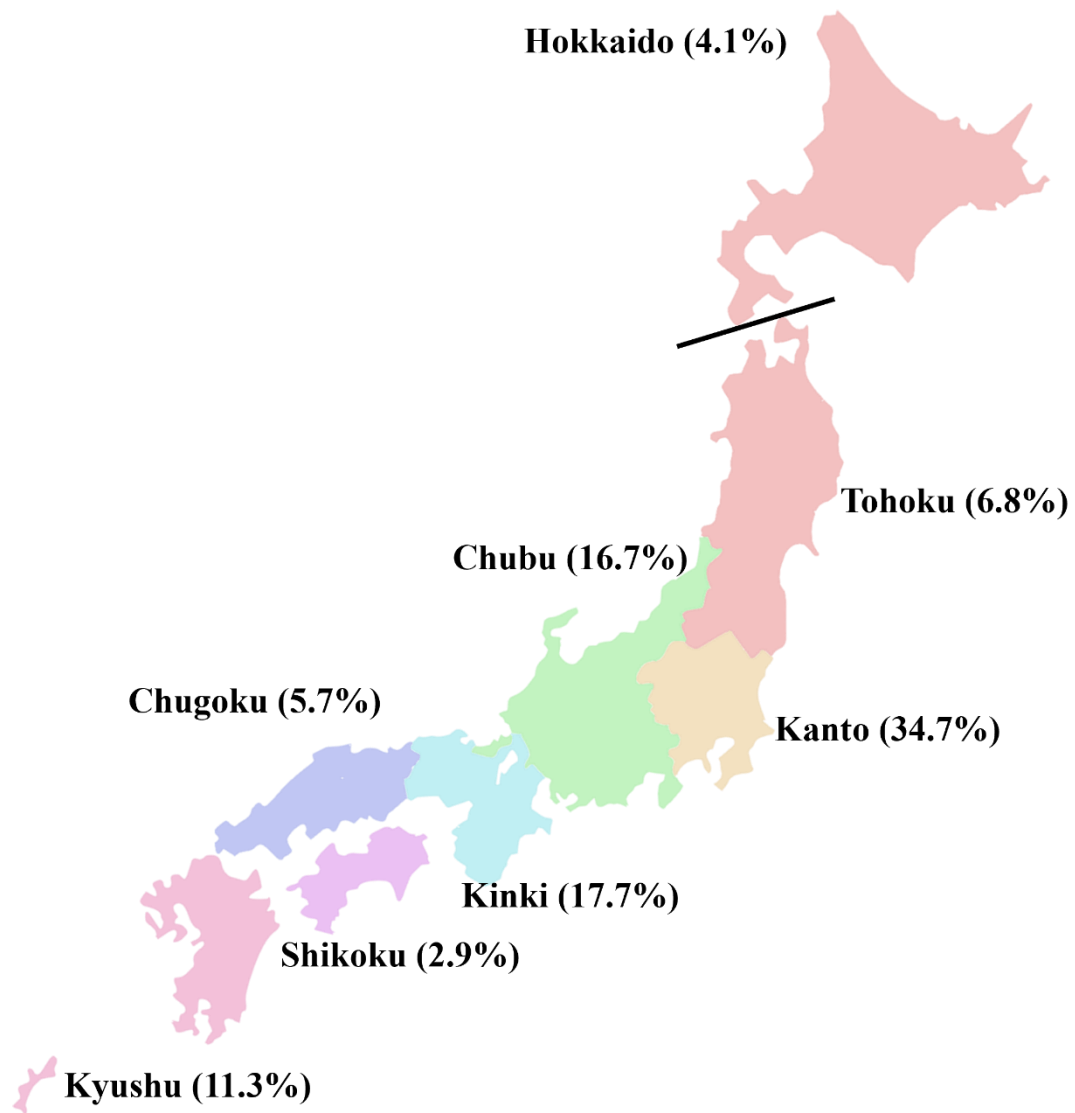

Supplement: JAH3-13-e031394-s001.pdf [file JAH3-13-e031394-s001.pdf]
